# Supplementary material for: Posttraumatic Stress and Somatic Symptoms in Firefighters: A Mediation Analysis of the Impact of Potentially Traumatic Events
Source: MDPI journal article supplement (doi:10.3390/soc13090206), 2023-09-08
Supplement: s1 [file s1]

Table S1: Sample characteristics

|                                                             | Firefighters<br>(n = 116)<br>M (SD) |
|-------------------------------------------------------------|-------------------------------------|
| Age                                                         | 34.78 (10.39)                       |
| Educational level (years of schooling)                      | 12.34 (2.97)                        |
| Experience (years of service as a firefighter) <sup>a</sup> | 11 (9.75)                           |
|                                                             | n (%)                               |
| <b>Firefighter status</b>                                   |                                     |
| Professional                                                | 57 (43.1)                           |
| Volunteer                                                   | 59 (50.9)                           |
| <b>Gender</b>                                               |                                     |
| Female                                                      | 29 (25)                             |
| Male                                                        | 87 (75)                             |
| <b>Marital status</b>                                       |                                     |
| Single                                                      | 65 (56)                             |
| Married/partnered                                           | 36 (31)                             |
| Divorced                                                    | 14 (12.1)                           |
| Widowed                                                     | 1 (0.9)                             |
| <b>Exposure to PTE</b>                                      |                                     |
| Death of family member                                      | 50 (43.1)                           |
| Death of a friend                                           | 43 (37.1)                           |
| Accident or illness                                         | 15 (12.9)                           |
| Accident or illness of a friend or family member            | 40 (34.5)                           |
| Work accident requiring medical care                        | 55 (47.4)                           |
| Work accident requiring hospitalization                     | 39 (33.6)                           |
| <b>Prevalence rates</b>                                     |                                     |
| PTSD symptoms                                               | 12.32 (12.7)                        |
| SSD symptoms                                                | 4.47 (3.9)                          |

<sup>a</sup> 3 missing data

Table S2. Results of PCA: factor loadings of the 1-factor model and communalities

| Variables                                 | F1   | $h^2$ |
|-------------------------------------------|------|-------|
| DASS-21 depression                        | .879 | .772  |
| DASS-21 anxiety                           | .819 | .671  |
| DASS-21 stress                            | .845 | .714  |
| BSI somatization                          | .846 | .715  |
| BSI obsession-compulsion                  | .852 | .725  |
| BSI interpersonal sensitivity             | .885 | .784  |
| BSI depression                            | .904 | .818  |
| BSI hostility                             | .730 | .533  |
| BSI anxiety                               | .918 | .843  |
| BSI phobic anxiety                        | .646 | .418  |
| BSI paranoid ideation                     | .810 | .655  |
| BSI psychoticism                          | .879 | .773  |
| F1 – Psychopathology (70.17% of Variance) |      |       |

Table S3. Pearson correlations

| Variable              | 1       | 2      | 3      | 4     | 5      | 6      | 7     | 8 |
|-----------------------|---------|--------|--------|-------|--------|--------|-------|---|
| 1. Gender             | -       |        |        |       |        |        |       |   |
| 2. Age                | -.037   | -      |        |       |        |        |       |   |
| 3. Firefighter status | -.231*  | -.038  | -      |       |        |        |       |   |
| 4. Work experience    | .130    | .724** | -.209* | -     |        |        |       |   |
| 5. SSD                | -.344** | -.038  | -.052  | .057  | -      |        |       |   |
| 6. PTSD               | -.094   | .035   | -.072  | .044  | .606** | -      |       |   |
| 7. Psychopathologies  | -.290** | .022   | .112   | -.050 | .632** | .760** | -     |   |
| 8. PTE                | .084    | -.083  | .154   | .054  | .274** | .285** | .226* | - |

\* $p < .05$ . \*\* $p < .01$ .
